# Supplementary material for: Pyridoxamine as a potential scavenger of neurotoxic dopamine quinone: Inhibition of dopamine-induced α-synuclein oligomerization
Source: Research Square preprint supplement (doi:10.21203/rs.3.rs-6478169/v1), 2025-05-12
Supplement: Supplementary file 1 [file 4a1428ea59febce6b9ae45cb.xlsx]

## Sheet: Sheet1
Accession	Description	Score	Coverage	# Proteins	# Unique Peptides	# Peptides	# PSMs	# AAs	MW [kDa]	calc. pI
alpha-suniclein(1-140)	alpha-suniclein(1-140)	71.0766	68.57	1	13	14	115	140	14.4512	4.70361
	A2	Sequence	Modifications	Charge	MH+ [Da]	ΔM [ppm]	m/z [Da]	RT [min]
	High	TKEQVTNVGGAVVTGVTAVAQK		2	2157.25	29.6818	1079.13	31.6872
	High	AKEGVVAAAEK		2	1072.18	-390.165	536.594	19.5078
	High	EQVTNVGGAVVTGVTAVAQK		2	1927.48	-294.294	964.242	32.8165
	High	TVEGAGSIAAATGFVK		2	1478.64	-98.118	739.824	32.255
	High	EGVVHGVATVAEK		2	1297.46	1361.13	649.234	24.0305
	High	TKEGVVHGVATVAEK		3	1524.8	-26.461	508.937	23.0778
	High	TKEGVLYVGSK		2	1181.73	906.968	591.368	25.1087
	High	MDVFMK		1	770.917	725.143	770.917	29.2235
	High	KDQLGK		2	687.997	-584.272	344.502	14.3778
	High	TVEGAGSIAAATGFVKK		2	1607.35	290.832	804.177	30.2682
	High	DQLGK		1	561.006	1251.72	561.006	14.8702
	High	EGVVAAAEK		1	874.163	795.788	874.163	20.3795
	High	EGVLYVGSK		1	951.168	-364.182	951.168	26.4548
	High	QGVAEAAGK		1	831.212	932.177	831.212	17.0765
