# Supplementary material for: Pyridoxamine as a potential scavenger of neurotoxic dopamine quinone: Inhibition of dopamine-induced α-synuclein oligomerization
Source: Research Square preprint supplement (doi:10.21203/rs.3.rs-6478169/v1), 2025-05-12
Supplement: Supplementary file 2 [file 8d050d83e4d3b7f4605d9de4.xlsx]

## Sheet: Sheet1
Accession	Description	Score	Coverage	# Proteins	# Unique Peptides	# Peptides	# PSMs	# AAs	MW [kDa]	calc. pI
alpha-suniclein(1-140)	alpha-suniclein(1-140)	92.55	88.57	1	9	11	80	140	14.4512	4.70361
	A2	Sequence	Modifications	Charge	MH+ [Da]	ΔM [ppm]	m/z [Da]	RT [min]
	High	GAGSIAAATGFVKKDQLGKNEE		2	2192.08	432.726	1096.55	45.0238
	High	MDVFMKGLSKAKE		2	1483.41	-241.202	742.207	45.4548
	High	KTKEQVTNVGGAVVTGVTAVAQKTVE		2	2615.58	437.137	1308.3	56.5878
	High	GVLYVGSKTKE		2	1181.68	868.781	591.346	34.4737
	High	GAGSIAAATGFVKKDQLGKNEEGAPQEGILE		2	3085.78	63.8996	1543.39	52.0543
	High	GVVHGVATVAE		2	1038.1	-439.534	519.554	36.5958
	High	KTKQGVAE		2	860.098	-448.583	430.553	16.204
	High	AYEMPSEE		1	956.041	699.914	956.041	35.7595
	High	QVTNVGGAVVTGVTAVAQKTVE		2	2129.05	415.686	1065.03	60.2228
	High	GVVAAAE		1	615.934	-643.767	615.934	27.6022
	High	DMPVDPDNE		2	1032.06	640.878	516.534	24.7787
